# Supplementary material for: Decreased CSTB, RAGE, and Axl Receptor Are Associated with Zika Infection in the Human Placenta
Source: MDPI journal article supplement (doi:10.3390/cells11223627), 2022-11-16
Supplement: s1 [file s1]

## Supplementary

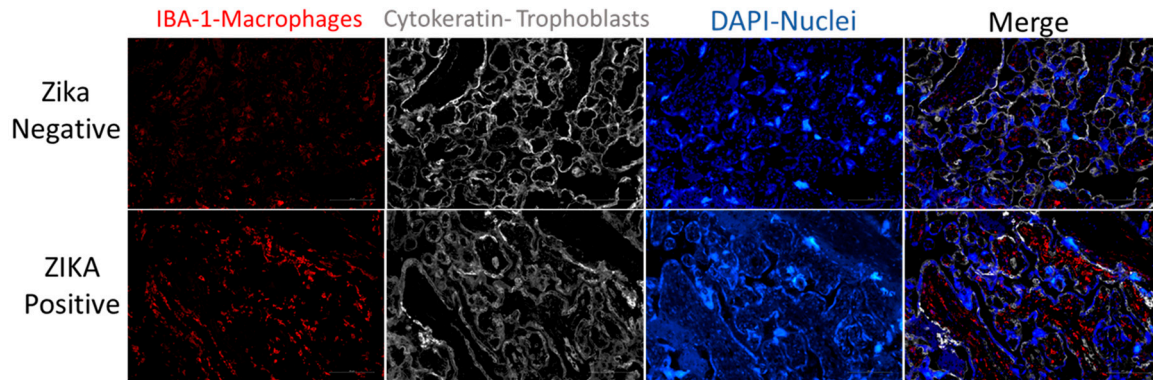

**Supplementary Figure S1. Macrophage labeling of placental tissue in Zika negative and Zika positive placentas. Representative fluorescence immunohistochemistry of ZIKV uninfected placental tissue and ZIKV infected tissue.** Protein labeling of Zika positive and Zika negative placentas expression in the placenta. The tissue is labeled with DAPI for nuclei (Blue), with anti-Iba1 for placental macrophages or Hofbauer cells (Red) and with anti-cytokeratin 8+18 (Pink) for trophoblast cells. Pictures were captured at a magnification of 20X.

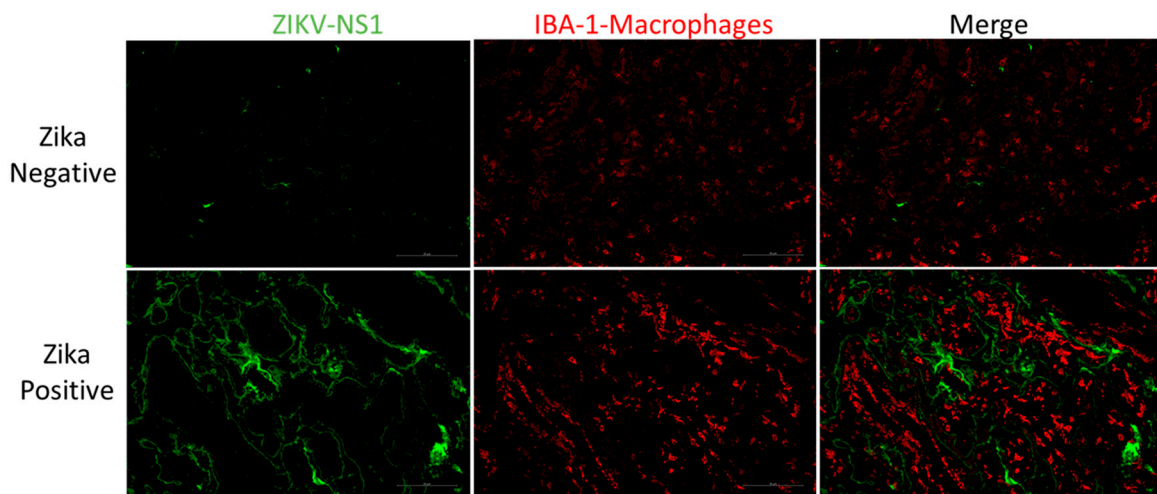

**Supplementary Figure S2. Localization of Zika Non-Structural Protein 1 of placental tissue in Zika negative and Zika positive placentas. Representative fluorescence immunohistochemistry of ZIKV uninfected placental tissue and ZIKV infected tissue.** Protein labeling of Zika positive and Zika negative placentas expression in the placenta. The tissue is labeled with DAPI for nuclei (Blue), with anti-Iba1 for placental macrophages or Hofbauer cells (Red) and anti-NS1 (Green). Pictures were captured at a magnification of 20X.

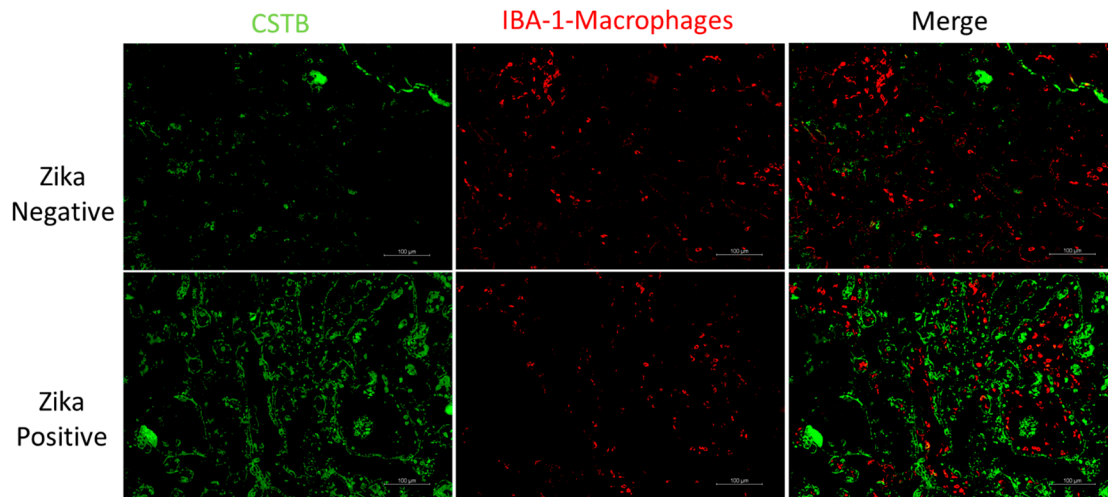

**Supplementary Figure S3. Localization of Cystatin B in placental tissue of Zika negative and Zika positive placentas.** Representative fluorescence immunohistochemistry of ZIKV uninfected placental tissue and ZIKV infected tissue. Protein labeling of Zika positive and Zika negative placentas expression in the placenta. The tissue is labeled with DAPI for nuclei (Blue), with anti-Iba1 for placental macrophages or Hofbauer cells (Red) and anti-NS1 (Green). Pictures were captured at a magnification of 20X.

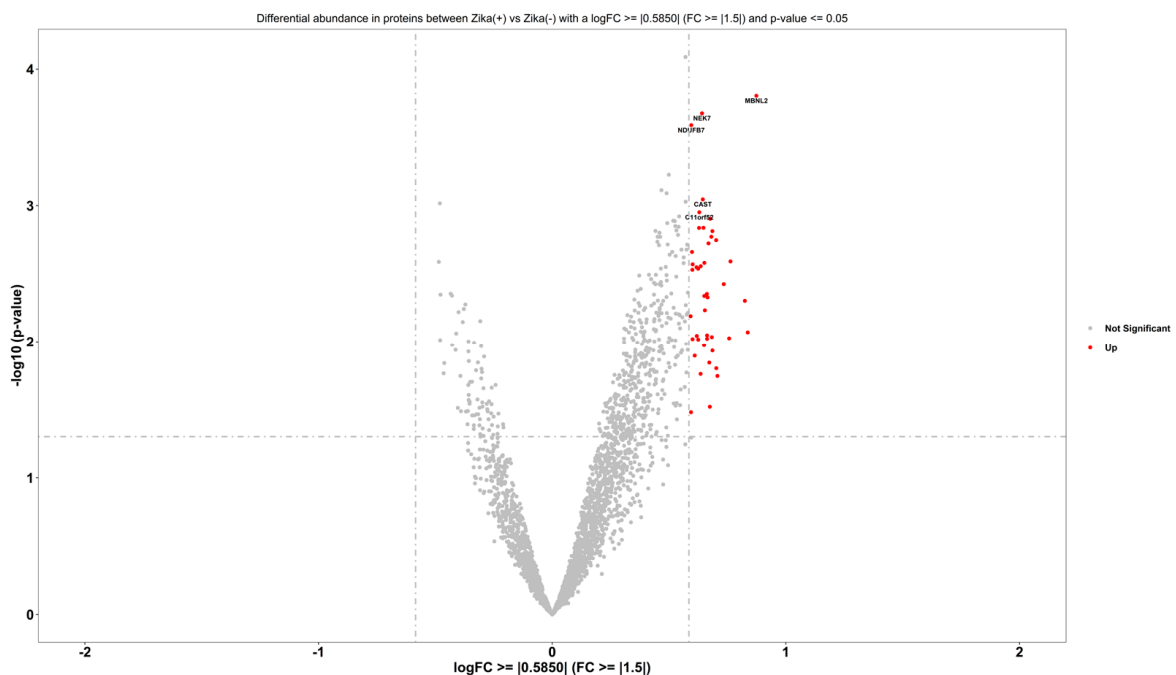

**Supplementary Figure S4: Volcano plot for comparison between Zika(+) vs. Zika(-).** The statistical analysis performed was a single channel analysis between cases vs. controls. The results from the statistical analysis were considered as proteins differentially abundant between groups based on  $FC \geq |1.5|$  and  $p\text{-value} \leq 0.05$ . More abundant (red dots) and no difference in abundance (grey dots).

| Accession ID | Name                                                                        | logFC  | FC    | pValue |
|--------------|-----------------------------------------------------------------------------|--------|-------|--------|
| O43148       | mRNA cap guanine-N7 methyltransferase                                       | 0.6007 | 1.516 | 0.0095 |
| O43865       | S-adenosylhomocysteine hydrolase-like protein 1                             | 0.5995 | 1.515 | 0.0030 |
| O95361       | Tripartite motif-containing protein 16                                      | 0.6284 | 1.546 | 0.0015 |
| P02545       | Prelamin-A/C                                                                | 0.6350 | 1.553 | 0.0174 |
| P04792       | Heat shock protein beta-1                                                   | 0.6356 | 1.554 | 0.0028 |
| P07437       | Tubulin beta chain                                                          | 0.6247 | 1.542 | 0.0096 |
| P08240       | Signal recognition particle receptor subunit alpha                          | 0.6245 | 1.542 | 0.0029 |
| P09012       | U1 small nuclear ribonucleoprotein A                                        | 0.6858 | 1.609 | 0.0117 |
| P17568       | NADH dehydrogenase [ubiquinone] 1 beta subcomplex subunit 7                 | 0.5952 | 1.511 | 0.0003 |
| P20337       | Ras-related protein Rab-3B                                                  | 0.5921 | 1.507 | 0.0065 |
| P20810-6     | Isoform 6 of Calpastatin                                                    | 0.6444 | 1.563 | 0.0009 |
| P23246       | Splicing factor, proline- and glutamine-rich                                | 0.7572 | 1.690 | 0.0094 |
| P26196       | Probable ATP-dependent RNA helicase DDX6                                    | 0.6649 | 1.585 | 0.0047 |
| P29466       | Caspase-1                                                                   | 0.6628 | 1.583 | 0.0089 |
| P50443       | Sulfate transporter                                                         | 0.7015 | 1.626 | 0.0018 |
| P52943       | Cysteine-rich protein 2                                                     | 0.7022 | 1.627 | 0.0158 |
| P68104       | Elongation factor 1-alpha 1                                                 | 0.6808 | 1.603 | 0.0017 |
| Q00839       | Heterogeneous nuclear ribonucleoprotein U                                   | 0.6099 | 1.526 | 0.0127 |
| Q07666       | KH domain-containing, RNA-binding, signal transduction-associated protein 1 | 0.6831 | 1.606 | 0.0092 |
| Q08379       | Golgin subfamily A member 2                                                 | 0.8245 | 1.771 | 0.0050 |
| Q14157-1     | Isoform 2 of Ubiquitin-associated protein 2-like                            | 0.8367 | 1.786 | 0.0085 |
| Q15365       | Poly(rC)-binding protein 1                                                  | 0.6508 | 1.570 | 0.0046 |
| Q5VZF2       | Muscleblind-like protein 2                                                  | 0.8737 | 1.832 | 0.0002 |
| Q6VY07       | Phosphofurin acidic cluster sorting protein 1                               | 0.6470 | 1.566 | 0.0015 |
| Q6ZN17       | Protein lin-28 homolog B                                                    | 0.6746 | 1.596 | 0.0302 |
| Q8N0X7       | Spartin                                                                     | 0.6685 | 1.589 | 0.0019 |
| Q8N370       | Large neutral amino acids transporter small subunit 4                       | 0.6533 | 1.573 | 0.0059 |
| Q8N3F8       | MICAL-like protein 1                                                        | 0.5940 | 1.509 | 0.0331 |
| Q8TDX7       | Serine/threonine-protein kinase Nek7                                        | 0.6412 | 1.560 | 0.0002 |
| Q8WU90       | Zinc finger CCCH domain-containing protein 15                               | 0.6189 | 1.536 | 0.0090 |
| Q92625       | Ankyrin repeat and SAM domain-containing protein 1A                         | 0.6761 | 1.598 | 0.0012 |
| Q92734       | Protein TFG                                                                 | 0.7340 | 1.663 | 0.0038 |
| Q96A22       | Uncharacterized protein C11orf52                                            | 0.6296 | 1.547 | 0.0011 |
| Q96CW1       | AP-2 complex subunit mu                                                     | 0.6176 | 1.534 | 0.0028 |
| Q96PU8       | Protein quaking                                                             | 0.7628 | 1.697 | 0.0026 |
| Q99700       | Ataxin-2                                                                    | 0.6498 | 1.569 | 0.0107 |
| Q9BQE3       | Tubulin alpha-1C chain                                                      | 0.6618 | 1.582 | 0.0044 |
| Q9BZV2       | Thiamine transporter 2                                                      | 0.6721 | 1.593 | 0.0143 |
| Q9H4A3       | Serine/threonine-protein kinase WNK1                                        | 0.7070 | 1.632 | 0.0180 |
| Q9P016       | Thymocyte nuclear protein 1                                                 | 0.6628 | 1.583 | 0.0095 |
| Q9UBV8       | Peflin                                                                      | 0.6855 | 1.608 | 0.0015 |
| Q9UNH7       | Sorting nexin-6                                                             | 0.6007 | 1.516 | 0.0027 |
| Q9Y2D5       | A-kinase anchor protein 2                                                   | 0.5981 | 1.514 | 0.0022 |
| Q9Y5X1       | Sorting nexin-9                                                             | 0.6509 | 1.570 | 0.0026 |

**Supplementary Table S1. Differentially abundant proteins were identified per group comparison with a Fold Change  $\geq |1.5|$  and p-value  $\leq 0.05$ .**

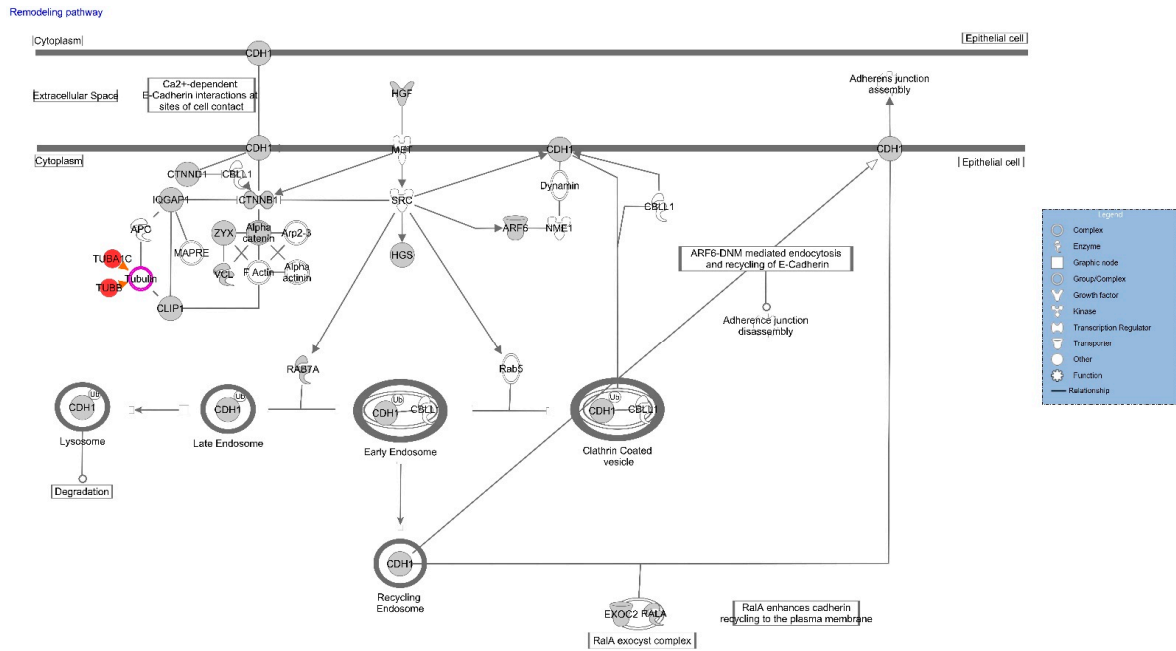

© 2000-2022 QIAGEN. All rights reserved.

**Supplementary Figure S5. Overexpression of Tubulin in Remodeling of Epithelial Adherent Junctions pathway.** Prediction legend, the intensity of red means higher upregulation of the protein. These proteins are the tubulin alpha-1C chain (TUBA1C) and the tubulin beta chain (TUBB). The grey means that protein was identified, but there was no significant increase in expression. Data was analyzed using IPA (QIAGEN Inc., <https://www.qiagenbioinformatics.com/products/ingenuitypathway-analysis>, accessed 15/09/22).
